# Supplementary material for: One-step synthesis of nitrogen-doped microporous carbon materials as metal-free electrocatalysts for oxygen reduction reaction
Source: Royal Society of Chemistry journal article supplement (doi:10.1039/c4ta00846d), 2014-01-01
Supplement: c4ta00846d1.pdf [file c4ta00846d1.pdf]

## Supporting Information

# **One-step synthesis of nitrogen-doped microporous carbon materials as metal-free electrocatalysts for oxygen reduction reaction**

Xiaojun Zhao,<sup>abc</sup> Huanyu Zhao,<sup>ab</sup> Tingting Zhang,<sup>b</sup> Xuecheng Yan,<sup>a</sup> Ye Yuan,<sup>b</sup> Haiming Zhang,<sup>d</sup> Huijun Zhao,<sup>d</sup> Daming Zhang,<sup>c</sup> Guangshan Zhu,<sup>\*ab</sup> and Xiangdong Yao<sup>\*a</sup>

<sup>a</sup> Queensland Micro- and Nanotechnology Centre, Griffith University, Nathan QLD 4111, Australia

<sup>b</sup> State Key Laboratory of Inorganic Synthesis & Preparative Chemistry, Jilin University, Changchun 130012, China

<sup>c</sup> College of Electronic Science & Engineering, Jilin University, Changchun 130012, China

<sup>d</sup> Centre for Clean Environment and Energy, Gold Coast Campus, Griffith University, QLD 4222, Australia

E-mail: g.zhu@jlu.edu.au; x.yao@griffith.edu.au.

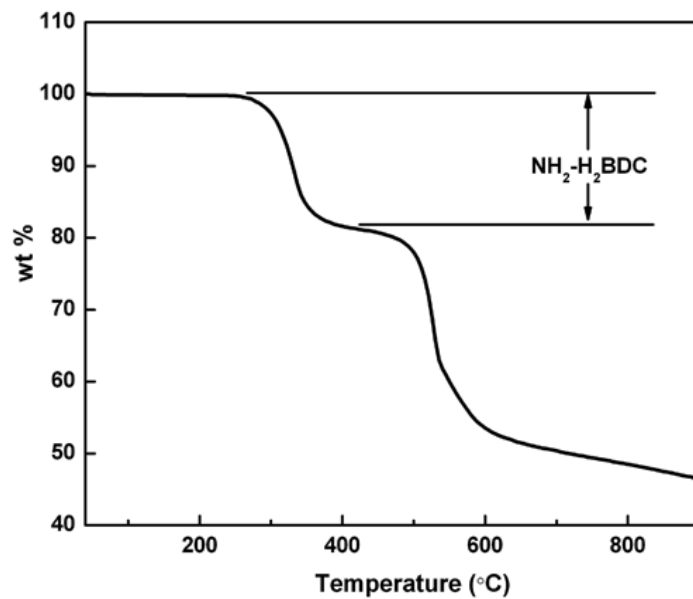

Figure S1. TG curve of amino-MIL-53(Al) synthesized in this work.

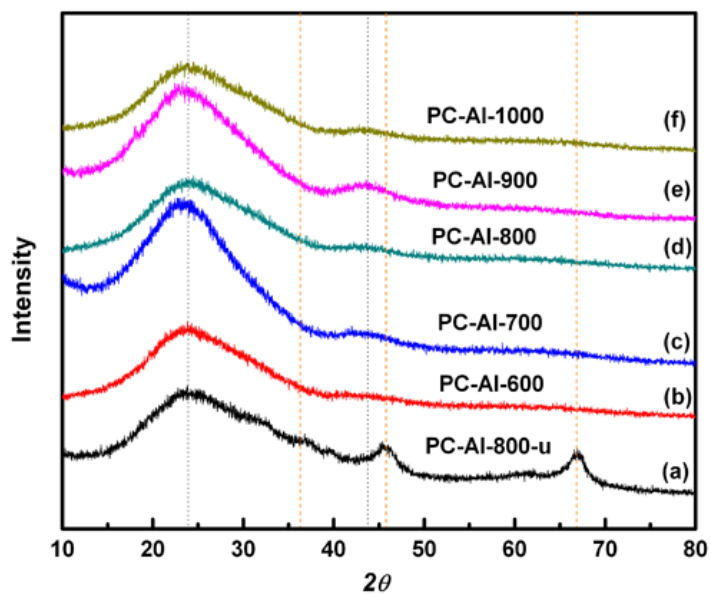

Figure S2. Wide-angle X-ray diffraction patterns of carbonized products: amino-MIL-53(Al) was carbonized at 800°C without HF treatment (a), PC-Al-600 (b), 700 (c), 800 (d), 900 (e) and 1000 (f).

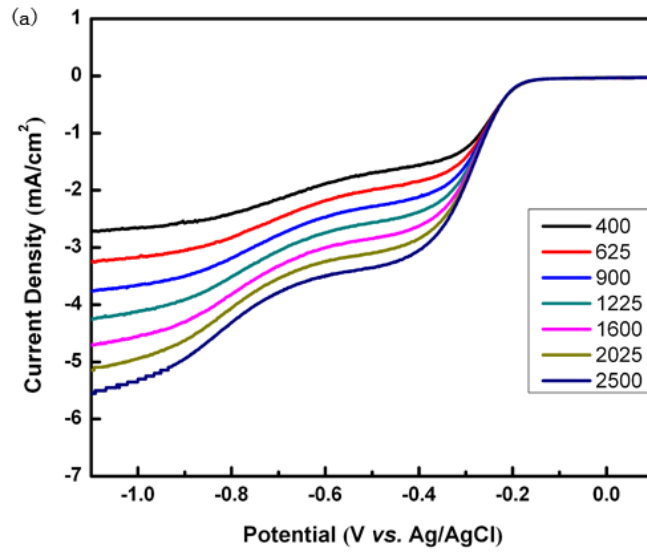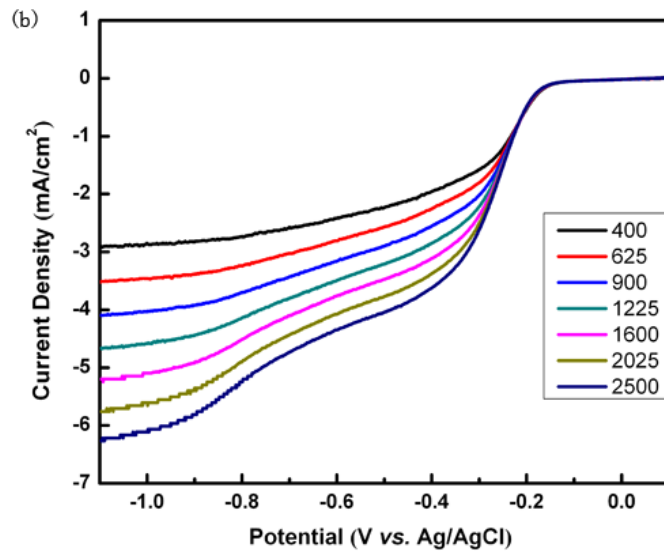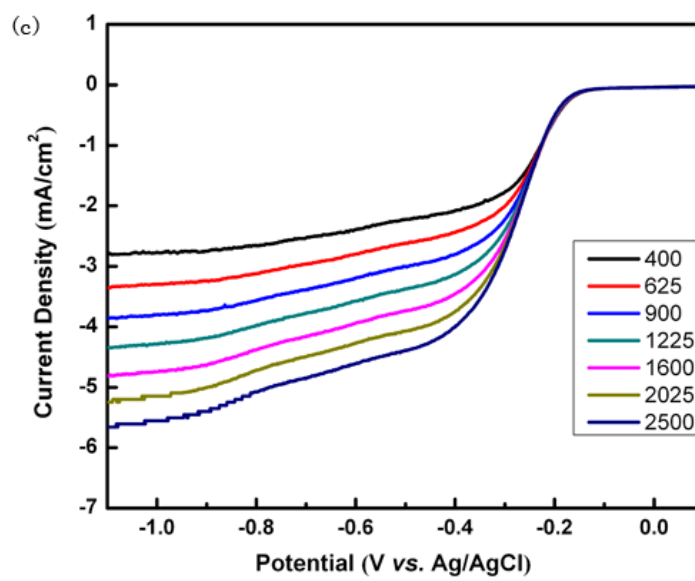

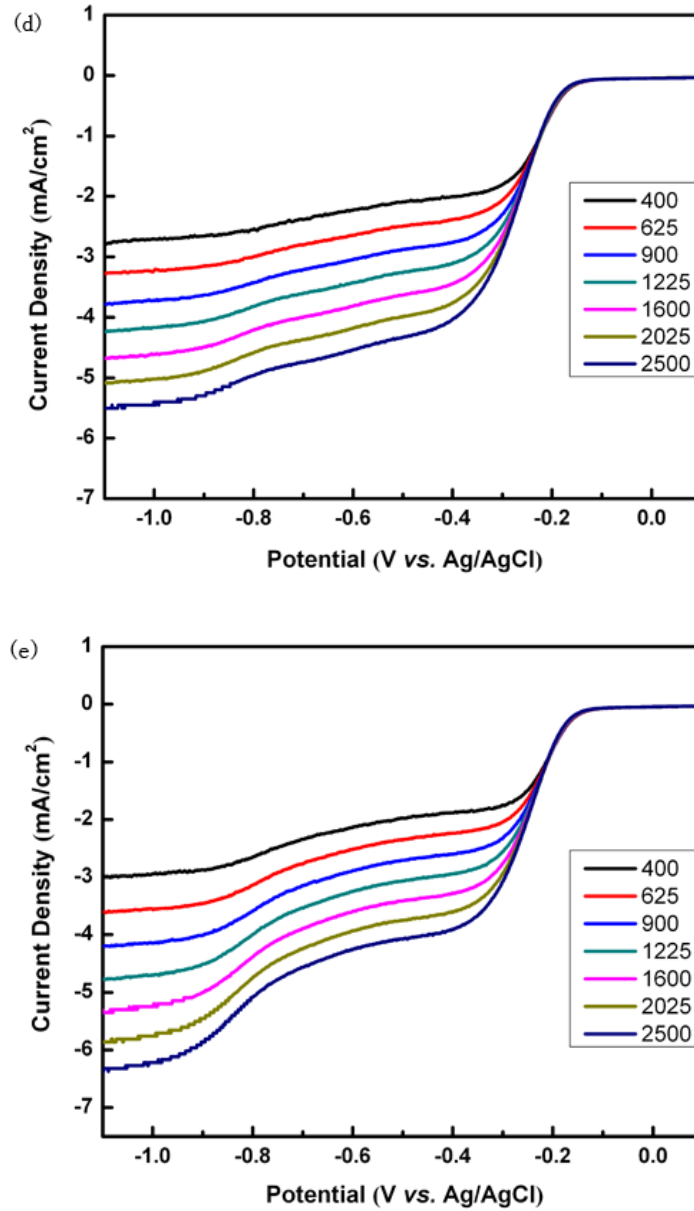

**Figure S3.** Linear sweep voltammogram (LSV) of PC-Al- $n$  ( $n = 600$  (a),  $700$  (b),  $800$  (c),  $900$  (d) and  $1000$  (e)) in oxygen -saturated  $0.1\text{M}$  KOH solution. The rotation speed of GC electrode is varied from  $400$  to  $2500$  rpm and the scan rate is  $10\text{ mV}\cdot\text{s}^{-1}$ . Pt wire was used as the counter electrode and Ag/AgCl was used as the reference electrode.

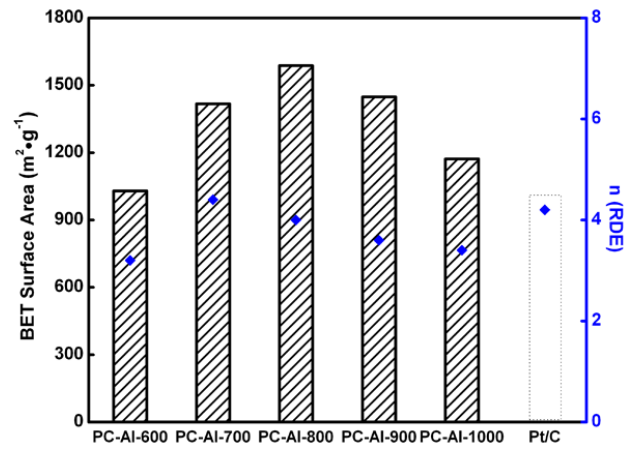

**Figure S4.** BET surface area and number of electron transferred for PC-Al- $n$  samples and Pt/C. The number of electron transferred was calculated from Koutecky–Levich equation.

**Table S1.** The proportion of Carbon and nitrogen calculated by XPS

| Temperature | C%    | N%   | N1%  | N2%  | N3%  |
|-------------|-------|------|------|------|------|
| 600         | 94.24 | 5.76 | 1.22 | 4.54 | 0    |
| 700         | 93.79 | 6.21 | 1.00 | 5.21 | 0    |
| 800         | 94.48 | 5.52 | 0.61 | 4.91 | 0    |
| 900         | 96.68 | 3.32 | 0.43 | 2.89 | 0    |
| 950         | 98.12 | 1.88 | 0.21 | 1.67 | 0    |
| 1000        | 98.55 | 1.45 | 0.11 | 0    | 1.34 |
| 1050        | 98.99 | 1.01 | 0.13 | 0    | 0.88 |

**Table S2.** Number of electron Transferred and the kinetic current density calculated at  $-0.55$  V ( vs Ag/AgCl).

|                                        | PC-Al-600 | PC-Al-700 | PC-Al-800 | PC-Al-900 | PC-Al-1000 | Pt/C |
|----------------------------------------|-----------|-----------|-----------|-----------|------------|------|
| RDE                                    | 3.2       | 4.2       | 4.0       | 3.6       | 3.4        | 4.2  |
| $J_k / \text{mA} \cdot \text{cm}^{-2}$ | 8.6       | 8.7       | 11.8      | 14.4      | 12.5       | 28.8 |
